# Supplementary material
Source: MDPI journal article supplement (https://www.mdpi.com/2073-4360/7/7/1232)
Supplement: s1 [file s1]

## Supplementary Information

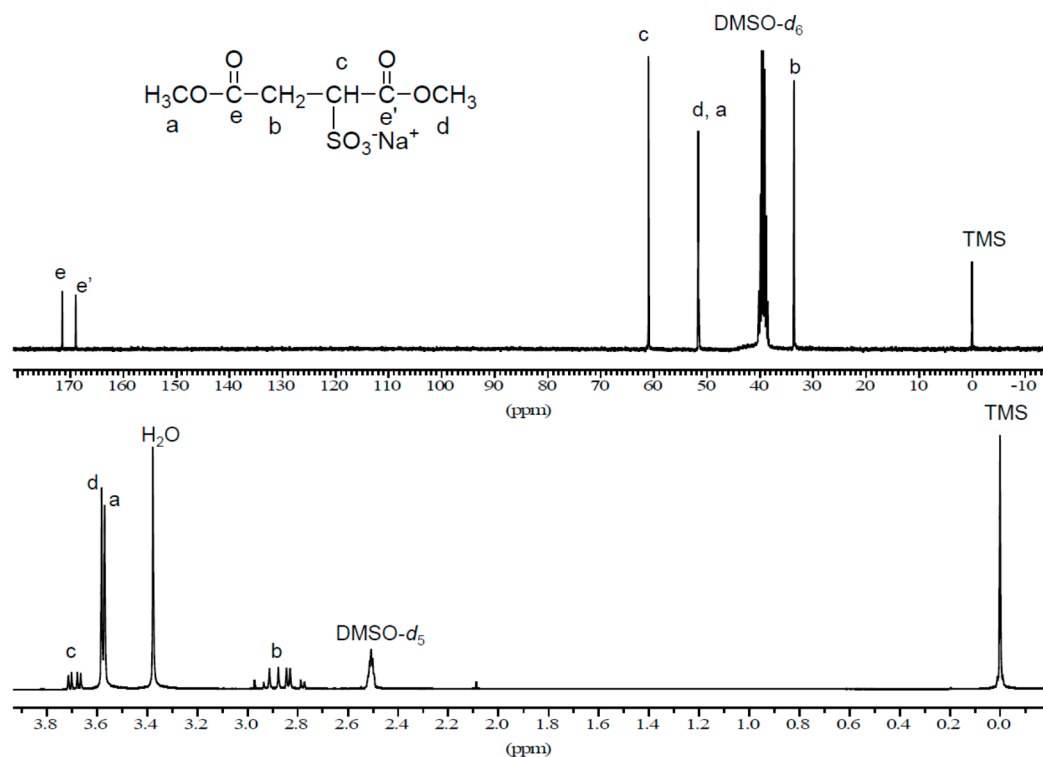

**Figure S1.**  $^1\text{H}$  NMR (bottom) and  $^{13}\text{C}$  NMR (top) spectra of SDMS.

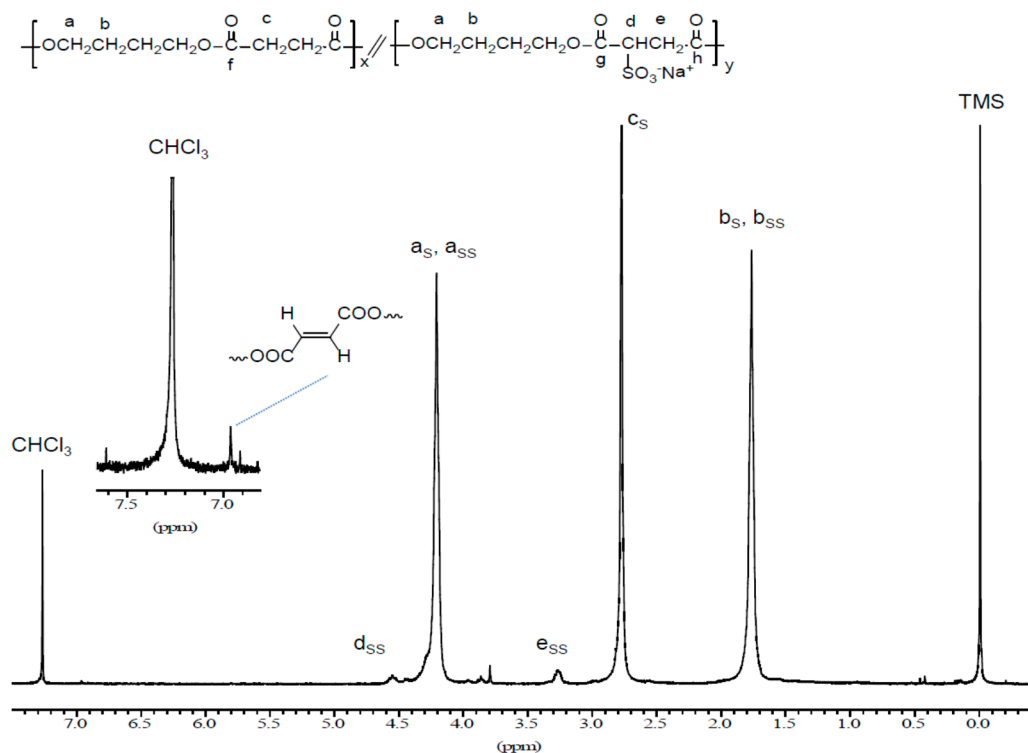

**Figure S2.**  $^1\text{H}$  NMR spectrum of PBS<sub>85</sub>SS<sub>15</sub> copolyester after heating at 210 °C for 30 min.

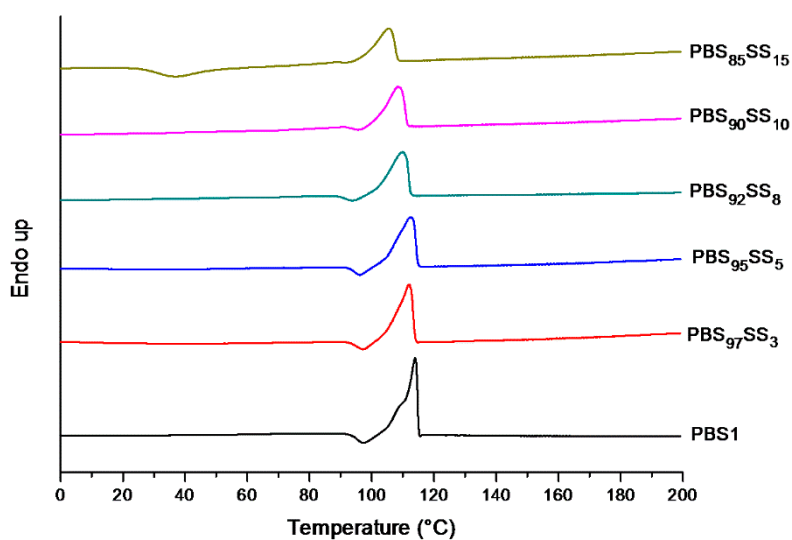

**Figure S3.** DSC thermograms (second heating) of  $\text{PBS}_x\text{SS}_y$  copolyesters.

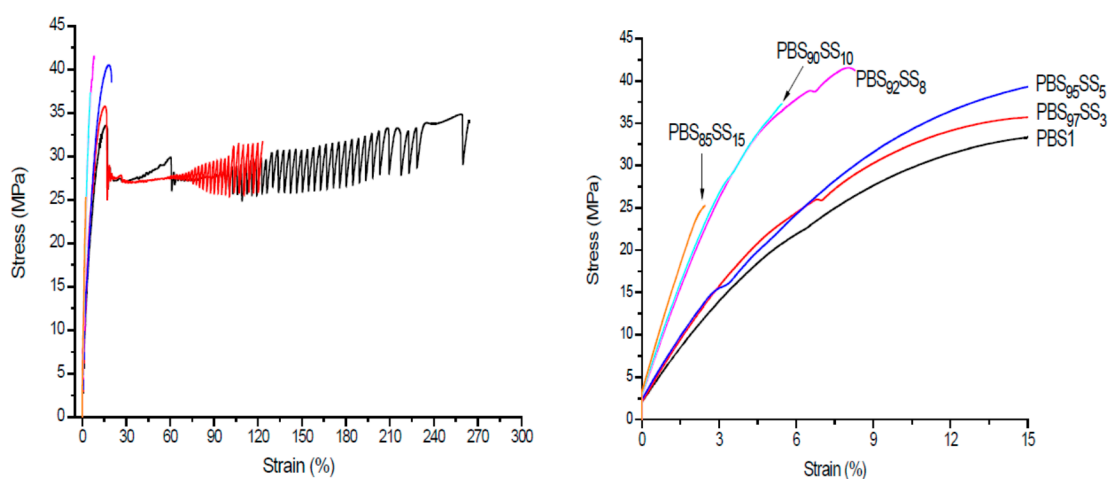

**Figure S4.** Stress-strain curves of  $\text{PBS}_x\text{SS}_y$  copolyesters (**left**). Expanded view of the elastic deformation region (**right**).

© 2015 by the authors; licensee MDPI, Basel, Switzerland. This article is an open access article distributed under the terms and conditions of the Creative Commons Attribution license (<http://creativecommons.org/licenses/by/4.0/>).
